# Supplementary material for: Development of a web-based intervention for the indicated prevention of depression
Source: PubMed Central journal article supplement (PMC3598782; doi:10.1186/1472-6947-13-26), 2013-02-20
Supplement: 1472-6947-13-26-S2.pdf [file 1472-6947-13-26-S2.pdf]

## Additional file 2 – Overview of Expected Needs of Prospective Users

| Expected Needs                            | n         | %         |
|-------------------------------------------|-----------|-----------|
| <i>Support and feedback</i>               | <i>17</i> | <i>94</i> |
| Contact with counselor                    | 8         | 44        |
| Feedback                                  | 8         | 44        |
| Personal attention                        | 3         | 17        |
| Specific instructions                     | 3         | 17        |
| Chat function                             | 1         | 6         |
| Being taken seriously                     | 1         | 6         |
| <i>Application</i>                        | <i>14</i> | <i>78</i> |
| User friendly                             | 12        | 67        |
| Attractive                                | 5         | 28        |
| Encouragement to complete the course      | 3         | 17        |
| <i>Content</i>                            | <i>13</i> | <i>72</i> |
| Added value                               | 8         | 44        |
| Effective                                 | 6         | 33        |
| To-the-point                              | 3         | 17        |
| Focus on real world                       | 1         | 6         |
| Varied assignments                        | 1         | 6         |
| <i>Service</i>                            | <i>10</i> | <i>56</i> |
| Flexible time planning                    | 5         | 28        |
| Fixed endpoint                            | 3         | 17        |
| Limited time behind pc                    | 1         | 6         |
| No need to go outdoors                    | 1         | 6         |
| Flexible pace                             | 1         | 6         |
| Anonymity                                 | 1         | 6         |
| Combines well with other activities       | 1         | 6         |
| Aftercare                                 | 1         | 6         |
| <i>Social support</i>                     | <i>8</i>  | <i>44</i> |
| Contact with others using the application | 8         | 44        |
